# Supplementary material for: Advanced CNC/PEG/PDMAA Semi-IPN Hydrogel for Drug Delivery Management in Wound Healing
Source: MDPI journal article supplement (doi:10.3390/gels8060340), 2022-05-30
Supplement: s1 [file s1]

Supplementary Materials

## Advanced CNC/PEG/PDMAA Semi-IPN Hydrogel for Drug Delivery Management in Wound Healing

Samia Afrin <sup>1,2</sup>, Md. Shahruzzaman <sup>1,\*</sup>, Papia Haque <sup>1</sup>, Md. Sazedul Islam <sup>1,3</sup>, Shafiul Hossain <sup>1,4,5</sup>, Taslim Ur Rashid <sup>1,6</sup>, Tanvir Ahmed <sup>1</sup>, Makoto Takafuji <sup>7</sup> and Mohammed Mizanur Rahman <sup>1</sup>

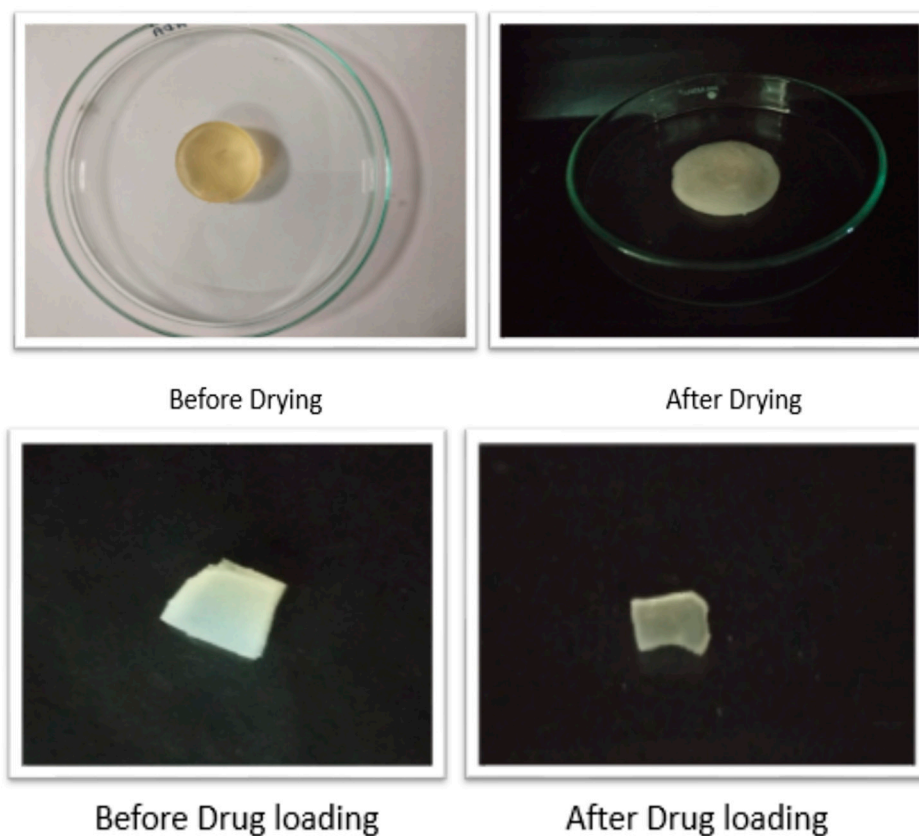

**Figure S1.** Images of CNC/PEG/PDMAA semi-IPN hydrogel - before and after freeze drying; and drug loading.

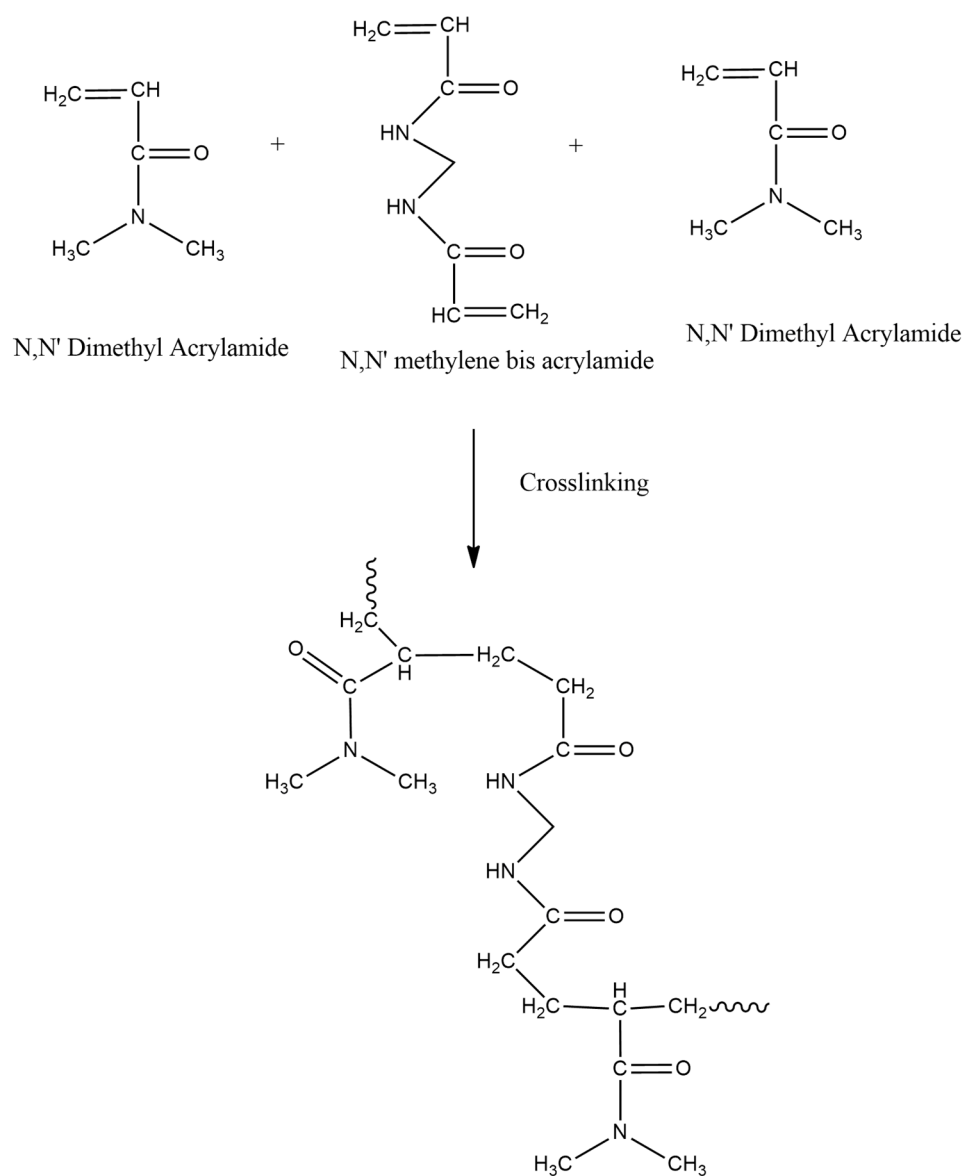

**Figure S2.** Cross-linking of DMAA to give PDMAA.
